# Supplementary material for: Sustainable synthesis of nitrogen-doped porous carbon with improved electrocatalytic performance for hydrogen evolution
Source: Royal Society of Chemistry journal article supplement (doi:10.1039/c8nj05819a), 2019-01-01
Supplement: c8nj05819a1.pdf [file c8nj05819a1.pdf]

## Electronic Supplementary Information

### New Journal of Chemistry

#### Sustainable synthesis nitrogen-doped porous carbon with improved electrocatalytic performance for hydrogen evolution

Xinxin Sang <sup>a</sup>, Jianping Chen <sup>a</sup>, Mingxiao Jing <sup>a</sup>, Gang Shi <sup>a</sup>, Caihua Ni <sup>a</sup>, Dawei Wang <sup>a</sup>, Wei Jin <sup>a, b, \*</sup>

<sup>a</sup> The Key Laboratory of Synthetic and Biological Colloids, Ministry of Education, School of Chemical and Material Engineering, Jiangnan University, Wuxi, Jiangsu 214122, China

<sup>b</sup> Institute of Process Engineering, Chinese Academy of Sciences, 1th Bei-er-tiao Zhongguancun, Beijing 100190, People's Republic of China

\* Corresponding authors E-mail: [wjin@ipe.ac.cn](mailto:wjin@ipe.ac.cn)

##### S1. Instrumentation.

The instruments used in this study were as follows: Fourier transform infrared (FT-IR) spectra were recorded on an Agilent Cary 660 FT-IR spectrometer in the 4000-400  $\text{cm}^{-1}$  region. Scanning electron microscopy (SEM) images were recorded on a SUPERSCAN SSX-550 electron microscope (Shimadzu, Japan) operating at 20 kV. Quadrasorb SI-MP system was used to measure the nitrogen sorption-isotherms at liquid nitrogen (77 K) temperature. The specific surface areas were evaluated using the Brunauer-Emmett-Teller (BET) method and the pore distribution was calculated by the BJH method from adsorption branches of isotherms. The elemental contents of C, H, and N in UiO-66 were determined using Flash EA1112 from Thermo. X-ray photoelectron spectroscopy (XPS) data were obtained with an ESCALab220i-XL electron spectrometer from VG Scientific using 300 W AlK $\alpha$  radiation. The base pressure was about  $3 \times 10^{-9}$  mbar. The binding energies were referenced to the C 1s line at 284.8 eV from adventitious carbon.

##### S2. Characterization Section

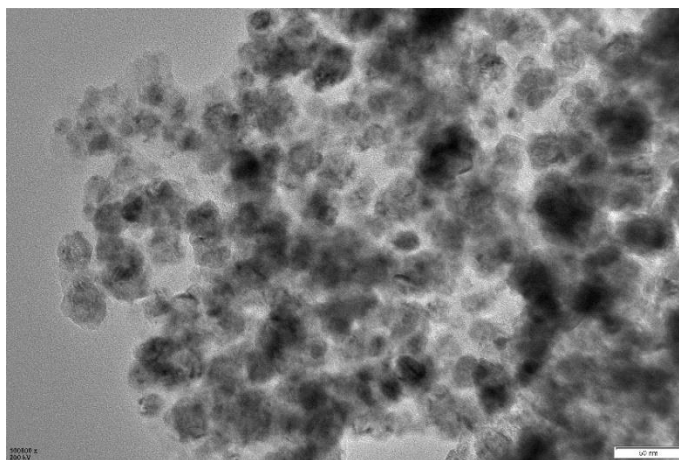

**Fig. S1** TEM image of Co-NC-ZR-600.

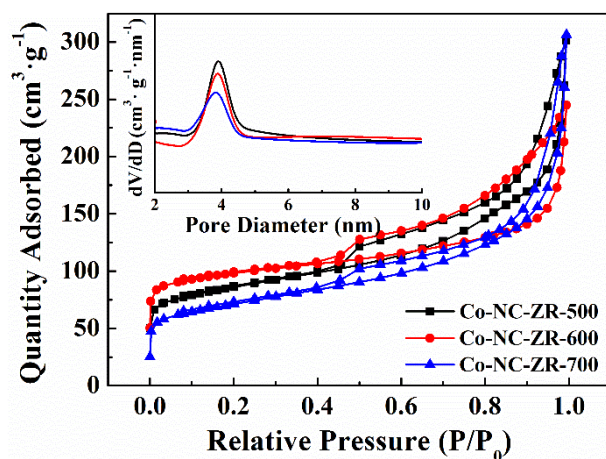

Fig. S2 (a) Nitrogen adsorption and desorption isotherms for Co-CN nanocomposites at different temperature, and the insert is the pore size distribution.

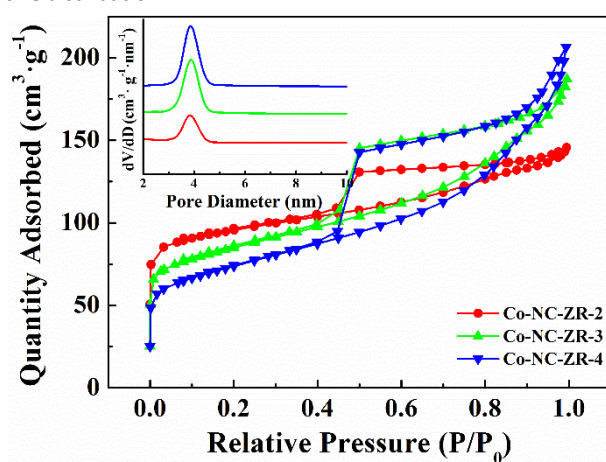

Fig. S3 Nitrogen adsorption and desorption isotherms for Co-CN nanocomposites with different RF content, and the insert is the pore size distribution.

Table S1 elemental contents, BET surface area, pore volume and pore width of the Co-NCs.

| Sample       | C(%) <sup>a</sup> | N(%) <sup>a</sup> | Co(Atomic %) <sup>b</sup> | S <sub>BET</sub><br>(m <sup>2</sup> g <sup>-1</sup> ) | Pore volume<br>(cm <sup>3</sup> g <sup>-1</sup> ) | Pore width/nm |
|--------------|-------------------|-------------------|---------------------------|-------------------------------------------------------|---------------------------------------------------|---------------|
| Co-NC-Z      | 24.38             | 3.46              | 3.59                      | 134.02                                                | 0.219                                             | 3.9           |
| Co-NC-ZR-500 | 52.40             | 4.01              | 0.75                      | 280.80                                                | 0.379                                             | 3.9           |
| Co-NC-ZR-600 | 45.10             | 3.12              | 1.68                      | 308.07                                                | 0.466                                             | 3.9           |
| Co-NC-ZR-700 | 33.68             | 2.8               | 1.84                      | 236.45                                                | 0.474                                             | 3.9           |
| Co-NC-ZR-2   | 57.65             | 3.86              | 1.65                      | 300.17                                                | 0.225                                             | 3.9           |
| Co-NC-ZR-3   | 57.90             | 1.48              | 0.82                      | 277.39                                                | 0.289                                             | 3.9           |
| Co-NC-ZR-4   | 61.84             | 1.02              | 0.55                      | 245.59                                                | 0.319                                             | 3.9           |

<sup>a</sup> obtained from elemental analysis, <sup>b</sup> obtained from XPS

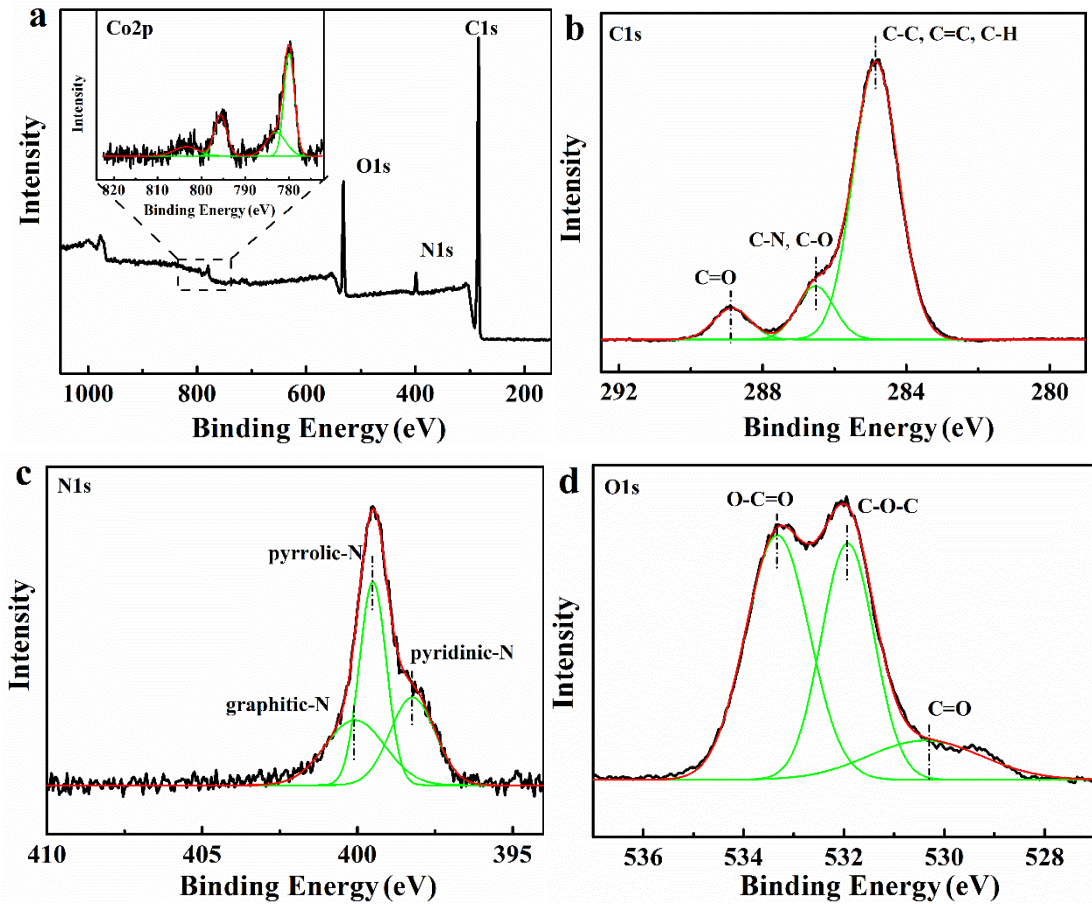

Fig. S4. XPS spectrum of Co-NC-Z (a), the insert is curve fitting of Co 2p; the curve fitting of C 1s (b), N 1s (c) and O 1s (d).

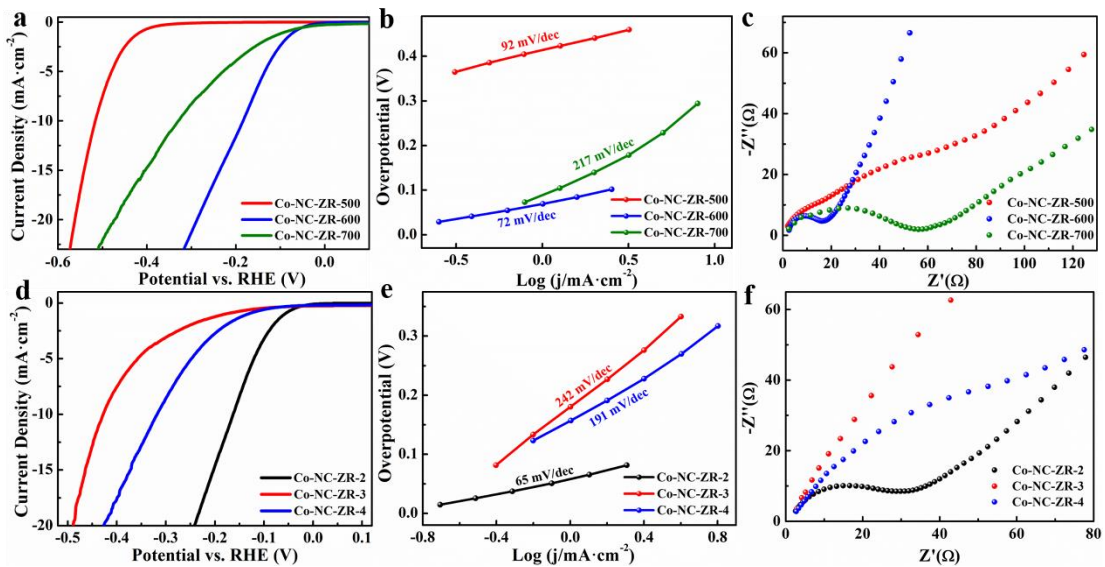

Fig. S5 (a, d) Linear sweep voltammograms, (b, e) Tafel plots and (c, f) Electrochemical impedance spectra (EIS) of Co-NC-ZR with different carbonization temperature and RF content recorded at open-circuit potential.

**Table S2** Comparison of hydrogen evolution activities of different electrocatalysts

| Electrocatalyst                                                  | Electrolyte                          | Onset potential (mV) | Tafel slope (mV per decade) | Ref.      |
|------------------------------------------------------------------|--------------------------------------|----------------------|-----------------------------|-----------|
| Co-NC-ZR-600                                                     | 0.5 M H <sub>2</sub> SO <sub>4</sub> | 57                   | 72                          | This work |
| Co-NC-ZR-2                                                       | 0.5 M H <sub>2</sub> SO <sub>4</sub> | 45                   | 65                          | This work |
| FeCo@N-doped carbon nanotubes                                    | 0.1 M H <sub>2</sub> SO <sub>4</sub> | 70                   | 74                          | 1         |
| nitrogen-doped graphene/cobalt embedded porous carbon polyhedron | 0.5 M H <sub>2</sub> SO <sub>4</sub> | 58                   | 126                         | 2         |
| Co-embedded N-rich carbon nanotubes                              | 0.5 M H <sub>2</sub> SO <sub>4</sub> | 89                   | 82                          | 3         |
| Au@NC                                                            | 0.5 M H <sub>2</sub> SO <sub>4</sub> | 53                   | 99                          | 4         |
| Co@N-C <sub>600</sub>                                            | 0.5 M H <sub>2</sub> SO <sub>4</sub> | 51                   | 97                          | 5         |
| NiS                                                              | 0.5 M H <sub>2</sub> SO <sub>4</sub> | --                   | 96                          | 6         |
| TiC-C microsphere                                                | 0.1 M HClO <sub>4</sub>              | 320                  | 95.6                        | 7         |

### References

1. J. Deng, P. Ren, D. Deng, L. Yu, F. Yang, X. Bao, *Energy Environ. Sci.*, 2014, **7**, 1919-1923.
2. Y. Hou, Z. Wen, S. Cui, S. Ci, S. Mao, J. Chen, *Adv. Funct. Mater.*, 2015, **25**, 872-882.
3. X. Dai, Z. Li, Y. Ma, M. Liu, K. Du, H. Su, H. Zhuo, L. Yu, H. Sun, X. Zhang, *ACS Appl. Mater. Interfaces*, 2016, **8**, 6439-6448.
4. W. Zhou, T. Xiong, C. Shi, J. Zhou, K. Zhou, N. Zhu, L. Li, Z. Tang, S. Chen, *Angew. Chem. Int. Ed.*, 2016, **55**, 8416-8420.
5. J. Yu, G. Li, H. Liu, A. Wang, L. Yang, W. Zhou, Y. Hu, B. Chu, *Int. J. Hydrog. Energy*, 2018, **43**, 12110-12118.
6. A. Wang, H. Li, J. Xiao, Y. Lu, M. Zhang, K. Hu, K. Yan, *ACS Sustainable Chem. Eng.*, 2018, **6**, 15995-16000.
7. Y. Wang, H. Deng, C. Ye, K. Hu, K. Yan, *J. Alloy. Compd.*, 2019, **775**, 348-352.
